# Supplementary material
Source: MDPI journal article supplement (https://www.mdpi.com/2073-8994/14/1/90)
Supplement: s1 [file s1]

## Model Parameters

**Table S1.** Model parameters

| Name                        | Value                     | Source          |
|-----------------------------|---------------------------|-----------------|
| ROS_death_AEC2              | 1.00e-3                   | [1]             |
| TGFb_ac_death_AEC2          | 1.65e-3                   | [1]             |
| setInitialDamageAEC2        | True/False                | /               |
| hitProbability              | 6.25e-2                   | [1] & Estimated |
| activationProbability_AEC2  | 0.25 [day-1]              | [1]             |
| measurement_cells_ops_freq_ | 1000                      | /               |
| measurement_conc_ops_freq_  | 1000                      | /               |
| nb_of_sim_steps_            | >=864000 (1 day)          | /               |
| nb_of_subs_                 | 10                        | /               |
| sim_time_step               | 0.1 [s]                   | /               |
| input_file_name             | CellsData.root            | /               |
| sub_resolution              | 10                        | /               |
| ECM_saturation              | 1e-2 [g cm-3]             | [1]             |
| $\lambda_{TGF\beta, IL13}$  | 1                         | [1]             |
| $\lambda_{ECM, TGF\beta}$   | 3.65e+3                   | Est.            |
| MMP_ECM_binding             | 2.59e+7 [cm3 g-1 day-1]   | [1]             |
| MMP_TIMP_binding            | 1.04e+9 [cm3 g-1 day-1]   | [1]             |
| TIMP_MMP_binding            | 4.98e+8 [cm3 g-1 day-1]   | [1]             |
| ECM_flat_conc               | 3.26e-3 [g cm-3]          | [1]             |
| FGF2_flat_conc              | 0.00 [g cm-3]             | [2]             |
| IL13_flat_conc              | 3.20e-8 [g cm-3]          | [1]             |
| MCP1_flat_conc              | 0.00 [g cm-3]             | [1]             |
| MMP_flat_conc               | 0.37e-7 [g cm-3]          | [1]             |
| PDGF_flat_conc              | 0.35e-8 [g cm-3]          | [1]             |
| TGFb_ac_flat_conc           | 2.51e-12 [g cm-3]         | [1]             |
| TGFb_in_flat_conc           | 2.51e-12 [g cm-3]         | Estimated       |
| TIMP_flat_conc              | 5.74e-10 [g cm-3]         | [1]             |
| TNFa_flat_conc              | 2.50e-8 [g cm-3]          | [1]             |
| flat_conc                   | 0.0 [g cm-3]              | /               |
| ECM_D                       | 0.0 [ $\mu$ m2 day-1]     | [1]             |
| FGF2_D                      | 5.62e+6 [ $\mu$ m2 day-1] | [3]             |
| IL13_D                      | 1.08e+6 [ $\mu$ m2 day-1] | [1]             |
| MCP1_D                      | 1.73e+7 [ $\mu$ m2 day-1] | [1]             |
| MMP_D                       | 4.32e+6 [ $\mu$ m2 day-1] | [1]             |
| PDGF_D                      | 8.64e+6 [ $\mu$ m2 day-1] | [1]             |
| TGFb_ac_D                   | 4.32e+6 [ $\mu$ m2 day-1] | [1]             |
| TGFb_in_D                   | 4.32e+6 [ $\mu$ m2 day-1] | Est             |
| TIMP_D                      | 4.32e+6 [ $\mu$ m2 day-1] | [1]             |
| TNFa_D                      | 1.29e+6 [ $\mu$ m2 day-1] | [1]             |
| ECM_d                       | 3.70e-1 [day-1]           | [1]             |
| FGF2_d                      | 1.66 [day-1]              | [4]             |
| IL13_d                      | 1.25e+1 [day-1]           | [1]             |
| MCP1_d                      | 1.73 [day-1]              | [1]             |
| MMP_d                       | 4.32 [day-1]              | [1]             |
| PDGF_d                      | 3.84 [day-1]              | [1]             |
| TGFb_ac_d                   | 3.33e+2 [day-1]           | [1]             |

|                              |                    |           |
|------------------------------|--------------------|-----------|
| TGFb_in_d                    | 1.10e+1 [day-1]    | Estimated |
| TIMP_d                       | 2.16e+1 [day-1]    | [1]       |
| TNFa_d                       | 5.55e+1 [day-1]    | [1]       |
| k_FGF2                       | 1.71e-9 [g cm-3]   | [5]       |
| k_IL13                       | 2.00e-7 [g cm-3]   | [1]       |
| k_MCP1                       | 5.00e-9 [g cm-3]   | [1]       |
| k_PDGF                       | 1.50e-8 [g cm-3]   | [1]       |
| k_TGFb_ac                    | 1.00e-10 [g cm-3]  | [1]       |
| k_TGFb_in                    | 1.00e-10 [g cm-3]  | Estimated |
| $\lambda_{FGF2,TGF\beta}$    | 3.00e-10 [g cm-3]  | [6]       |
| k_TNFa                       | 5.00e-7 [g cm-3]   | [1]       |
| AEC2_proliferation           | 2.63e-2 [day-1]    | Estimated |
| F_proliferation_IL13_TGFb    | 2.33e-1 [day-1]    | Estimated |
| $\lambda_{F,AEC2}$           | 1.44e-2 [day-1]    | Estimated |
| M0_basic_prob_production     | 8.46e-3 [day-1]    | Estimated |
| AEC2_AEC1_differentiation    | 9.80e-3 [day-1]    | Estimated |
| F_MF_PDGF_differentiation    | 1.17e-1 [day-1]    | Estimated |
| F_MF_TGFb_ac_differentiation | 1.17e-1 [day-1]    | Estimated |
| M1_M2_differentiation        | 1.41e-2 [day-1]    | Estimated |
| M2_M1_TNFa_differentiation   | 5.00e-3 [day-1]    | [1]       |
| AEC1_apoptosis               | 1.65e-2 [day-1]    | Estimated |
| AEC2_apoptosis               | 1.65e-2 [day-1]    | [1]       |
| active_AEC2_apoptosis        | 1.65e-2 [day-1]    | [1]       |
| F_apoptosis                  | 1.66e-2 [day-1]    | [1]       |
| M1_apoptosis                 | 2.00e-2 [day-1]    | [1]       |
| M2_apoptosis                 | 1.50e-2 [day-1]    | [1]       |
| MF_apoptosis                 | 1.66e-2 [day-1]    | [1]       |
| AEC2_FGF2_secretion          | 1.44e-14 [g day-1] | Estimated |
| AEC2_MCP1_secretion          | 5.98e-14 [g day-1] | Estimated |
| AEC2_TNFa_secretion          | 1.50e-11 [g day-1] | Estimated |
| AEC2_TGFb_secretion          | 1.07e-12 [g day-1] | Estimated |
| F_TGFb_secretion             | 1.57e-14 [g day-1] | Estimated |
| F_ECM_secretion              | 1.14e-8 [g day-1]  | Estimated |
| MF_ECM_secretion             | 2.28e-8 [g day-1]  | Estimated |
| M1_TNFa_secretion            | 3.00e-14 [g day-1] | Estimated |
| M2_IL13_secretion            | 3.67e-11 [g day-1] | Estimated |
| M2_MMP_secretion             | 9.67e-11 [g day-1] | Estimated |
| M2_PDGF_secretion            | 9.67e-12 [g day-1] | Estimated |
| M2_TGFb_secretion            | 3.82e-13 [g day-1] | Estimated |
| M2_TIMP_secretion            | 1.75e-11 [g day-1] | Estimated |

1. Hao W, Marsh C, Friedman A. A mathematical model of idiopathic pulmonary fibrosis. *PLoS One* (2015) **10**:1–19. doi:10.1371/journal.pone.0135097
2. Li CM, Khosla J, Pagan I, Hoyle P, Sannes PL. TGF- $\beta$ 1 and fibroblast growth factor-1 modify fibroblast growth factor-2 production in type II cells. *Am J Physiol - Lung Cell Mol Physiol* (2000) **279**:1038–1046. doi:10.1152/ajplung.2000.279.6.l1038
3. Kołodziej M, Sauer DG, Beck J, Marek WK, Hahn R, Jungbauer A, Dürauer A, Piątkowski W, Antos D. Scale up of a chromatographic capture step for a clarified bacterial homogenate – Influence of mass transport limitation and competitive adsorption of impurities. *J Chromatogr A* (2020) **1618**: doi:10.1016/j.chroma.2020.460856

4. Dvorak P, Bednar D, Vanacek P, Balek L, Eiselleova L, Stepankova V, Sebestova E, Kunova Bosakova M, Konecna Z, Mazurenko S, et al. Computer-assisted engineering of hyperstable fibroblast growth factor 2. *Biotechnol Bioeng* (2018) **115**:850–862. doi:10.1002/bit.26531
5. Grazul-Bilska AT, Luthra G, Reynolds LP, Bilski JJ, Johnson ML, Adbullah SA, Redmer DA, Abdullah KM. Effects of basic fibroblast growth factor (FGF-2) on proliferation of human skin fibroblasts in type II diabetes mellitus. *Exp Clin Endocrinol Diabetes* (2002) **110**:176–181. doi:10.1055/s-2002-32149
6. Xiao L. TGF-beta 1 induced fibroblast proliferation is mediated by the FGF-2/ERK pathway. *Front Biosci* (2012) **17**:2667. doi:10.2741/4077
